# Supplementary material
Source: PubMed Central journal article supplement (PMC7185944)
Supplement: mmc1.pdf [file mmc1.pdf]

# THE LANCET Infectious Diseases

## Supplementary webappendix

Supplement to: Bi Q, Wu Y, Mei S, et al. Epidemiology and transmission of COVID-19 in 391 cases and 1286 of their close contacts in Shenzhen, China: a retrospective cohort study. *Lancet Infect Dis* 2020; published online April 27. [https://doi.org/10.1016/S1473-3099\(20\)30287-5](https://doi.org/10.1016/S1473-3099(20)30287-5).

This translation in Chinese was submitted by the authors and we reproduce it as supplied. It has not been peer reviewed. *The Lancet's* editorial processes have only been applied to the original in English, which should serve as reference for this manuscript.

此简体中文译文由作者提交，我方按照提供的版本刊登。此译文并未经过同行审阅。医学期刊《柳叶刀》的编辑流程仅适用于英文原稿，英文原稿应作为此手稿的参考。

## Summary

**背景:** 在中国武汉迅速传播的新型冠状病毒(SARS-CoV-2)促使深圳加强了对新冠的监控。本研究所得数据为测量一系列描述疾病进程、传播和管控措施影响的关键指标提供了难得的机会。

**方法:** 从2020年1月14日到2月12日,深圳疾病预防控制中心发现了391例SARS-CoV-2的病例和1286位密切接触者。我们对比了基于症状发现的病例和基于密切接触者追踪发现的病例,并估算了从症状开始到确诊、隔离以及入院治疗的时间。我们估算了描述疾病传播的指标,并且分析了影响疾病传播风险的因素。

**结果:** 病例平均年龄45岁,比总人口的年龄偏大,但男女比例相似(男187人,女204人)。391例病例中的356人(91%)首诊时症状时的临床严重程度为轻型或普通型。截止到2020年2月22号为止,3例病例死亡,225例康复(康复时间的中位数为21天;95%CI: 20-22天)。病例平均在症状出现4.6天后隔离(95%CI: 4.1-5.0),而追踪接触者缩短了这个时长1.9天(95%CI: 1.1-2.7)。和其他一般接触者相比,家庭接触者以及共同旅行的人被感染的可能性更高,家庭接触者的OR值是6.27 [95% CI 1.49-26.33],旅行接触的OR值是7.06 [1.43-34.91]。家庭二代续发率是11.2% (95%CI: 9.1-13.8),儿童和成年人同样易感(十岁以下儿童的感染率为7.4%,人群整体感染率为6.6%)。通过样本观察到的再生数(R)为0.4 (95%CI 0.3-0.5),平均人际传染间隔时间为6.3天(95%CI 5.2-7.6)。

**释义:** 我们关于病例以及他们被感染和未被感染的密接者的数据提供了关于SARS-CoV-2流行病学方面的关键信息。我们的分析表明,隔离和追踪密接者减少了感染病例在社区的时间,从而降低了再生数(R)。然而,隔离和追踪密接者的总体影响尚不确定,而且高度取决于无症状病例的数量。此外,尽管儿童出现严重的症状可能性较小,但与普通人群相比感染风险相似。因此,应在分析传播和控制中考虑儿童。

**研究基金:** 哈尔滨工业大学应急项目,鹏程实验室应急项目,美国疾病预防控制中心

Copyright © 2020 Elsevier Ltd. All rights reserved.
