# Supplementary material
Source: PubMed Central journal article supplement (PMC7185944)
Supplement: mmc2.pdf [file mmc2.pdf]

# THE LANCET Infectious Diseases

## Supplementary webappendix

This webappendix formed part of the original submission and has been peer reviewed. We post it as supplied by the authors.

This online publication has been corrected. The corrected version first appeared at [thelancet.com](http://thelancet.com) on May 5, 2020.

Supplement to: Bi Q, Wu Y, Mei S, et al. Epidemiology and transmission of COVID-19 in 391 cases and 1286 of their close contacts in Shenzhen, China: a retrospective cohort study. *Lancet Infect Dis* 2020; published online April 27. [https://doi.org/10.1016/S1473-3099\(20\)30287-5](https://doi.org/10.1016/S1473-3099(20)30287-5).

## SUPPLEMENTARY MATERIAL

### Epidemiology and Transmission of COVID-19 in Shenzhen China: Analysis of 391 cases and 1,286 of their close contacts: a retrospective cohort study

**Table S1:** Additional clinical characteristics by mode of case detection

| Symptom              | Value | Contact-based (N=87) | Symptom-based (N=292) | Unknown/other (N=12) | Total (N=391) | P-value |
|----------------------|-------|----------------------|-----------------------|----------------------|---------------|---------|
| chill                | no    | 85 (97.7%)           | 272 (93.2%)           | 12 (100.0%)          | 369 (94.4%)   | 0.27    |
|                      | yes   | 2 (2.3%)             | 20 (6.8%)             | 0 (0.0%)             | 22 (5.6%)     |         |
| shortness of breath  | no    | 86 (98.9%)           | 281 (96.2%)           | 12 (100.0%)          | 379 (96.9%)   | 0.42    |
|                      | yes   | 1 (1.1%)             | 11 (3.8%)             | 0 (0.0%)             | 12 (3.1%)     |         |
| difficulty breathing | no    | 87 (100.0%)          | 285 (97.6%)           | 11 (91.7%)           | 383 (98.0%)   | 0.35    |
|                      | yes   | 0 (0.0%)             | 7 (2.4%)              | 1 (8.3%)             | 8 (2.0%)      |         |
| chest tightness      | no    | 85 (97.7%)           | 290 (99.3%)           | 12 (100.0%)          | 387 (99.0%)   | 0.17    |
|                      | yes   | 2 (2.3%)             | 2 (0.7%)              | 0 (0.0%)             | 4 (1.0%)      |         |
| chest pain           | no    | 85 (97.7%)           | 281 (96.2%)           | 12 (100.0%)          | 378 (96.7%)   | 0.77    |
|                      | yes   | 2 (2.3%)             | 11 (3.8%)             | 0 (0.0%)             | 13 (3.3%)     |         |
| conjunctivitis       | no    | 87 (100.0%)          | 290 (99.3%)           | 12 (100.0%)          | 389 (99.5%)   | 1.00    |
|                      | yes   | 0 (0.0%)             | 2 (0.7%)              | 0 (0.0%)             | 2 (0.5%)      |         |
| nausea               | no    | 87 (100.0%)          | 292 (100.0%)          | 12 (100.0%)          | 391 (100.0%)  | 1.00    |
|                      | yes   | 0 (0.0%)             | 0 (0.0%)              | 0 (0.0%)             | 0 (0.0%)      |         |
| vomit                | no    | 87 (100.0%)          | 289 (99.0%)           | 12 (100.0%)          | 388 (99.2%)   | 0.64    |
|                      | yes   | 0 (0.0%)             | 3 (1.0%)              | 0 (0.0%)             | 3 (0.8%)      |         |
| diarrhea             | no    | 86 (98.9%)           | 290 (99.3%)           | 12 (100.0%)          | 388 (99.2%)   | 0.57    |
|                      | yes   | 1 (1.1%)             | 2 (0.7%)              | 0 (0.0%)             | 3 (0.8%)      |         |
| stomachache          | no    | 83 (95.4%)           | 275 (94.2%)           | 12 (100.0%)          | 370 (94.6%)   | 0.78    |
|                      | yes   | 4 (4.6%)             | 17 (5.8%)             | 0 (0.0%)             | 21 (5.4%)     |         |
| cough                | no    | 67 (77.0%)           | 165 (56.5%)           | 6 (50.0%)            | 238 (60.9%)   | <0.01   |
|                      | yes   | 20 (23.0%)           | 127 (43.5%)           | 6 (50.0%)            | 153 (39.1%)   |         |
| runny nose           | no    | 86 (98.9%)           | 273 (93.5%)           | 12 (100.0%)          | 371 (94.9%)   | 0.14    |
|                      | yes   | 1 (1.1%)             | 19 (6.5%)             | 0 (0.0%)             | 20 (5.1%)     |         |
| sore throat          | no    | 83 (95.4%)           | 273 (93.5%)           | 9 (75.0%)            | 365 (93.4%)   | 0.60    |
|                      | yes   | 4 (4.6%)             | 19 (6.5%)             | 3 (25.0%)            | 26 (6.6%)     |         |
| headache             | no    | 77 (88.5%)           | 241 (82.5%)           | 10 (83.3%)           | 328 (83.9%)   | 0.25    |
|                      | yes   | 10 (11.5%)           | 51 (17.5%)            | 2 (16.7%)            | 63 (16.1%)    |         |
| fatigue              | no    | 80 (92.0%)           | 247 (84.6%)           | 11 (91.7%)           | 338 (86.4%)   | 0.17    |
|                      | yes   | 7 (8.0%)             | 45 (15.4%)            | 1 (8.3%)             | 53 (13.6%)    |         |
| muscle soreness      | no    | 81 (93.1%)           | 223 (76.4%)           | 11 (91.7%)           | 315 (80.6%)   | 0.01    |
|                      | yes   | 6 (6.9%)             | 69 (23.6%)            | 1 (8.3%)             | 76 (19.4%)    |         |
| joint soreness       | no    | 83 (95.4%)           | 247 (84.6%)           | 12 (100.0%)          | 342 (87.5%)   | 0.01    |
|                      | yes   | 4 (4.6%)             | 45 (15.4%)            | 0 (0.0%)             | 49 (12.5%)    |         |

**Table S2:** Distributional fits to key COVID-19 distributions. 95% CIs of the distributional fits were shown in the brackets.

| Time lag                                                  | Distribution | Parameter 1         | Parameter 2         | Mean                | 5%                  | 50%                 | 95%                    |
|-----------------------------------------------------------|--------------|---------------------|---------------------|---------------------|---------------------|---------------------|------------------------|
| Incubation period                                         | lognormal    | 1.57<br>(1.44,1.69) | 0.65<br>(0.56,0.73) | 5.95<br>(4.94,7.11) | 1.64<br>(1.33,2.04) | 4.80<br>(4.22,5.44) | 14.04<br>(12.19,15.90) |
| Serial interval                                           | gamma        | 2.29<br>(1.77,3.34) | 0.36<br>(0.26,0.57) | 6.29<br>(5.17,7.56) | 1.32<br>(0.92,1.87) | 5.41<br>(4.43,6.49) | 14.3<br>(11.12,17.57)  |
| Onset to PCR confirmation; among contact-based            | gamma        | 3.2<br>(2.43,4.76)  | 1.00<br>(0.71,1.57) | 3.18<br>(2.65,3.76) | 0.92<br>(0.7,1.26)  | 2.86<br>(2.4,3.37)  | 6.56<br>(5.25,8.01)    |
| Onset to PCR confirmation; among symptom-based            | gamma        | 2.12<br>(1.87,2.45) | 0.39<br>(0.33,0.46) | 5.46<br>(4.99,5.92) | 1.04<br>(0.88,1.26) | 4.63<br>(4.23,5.03) | 12.71<br>(11.51,13.82) |
| Onset to hospitalization; among contact-based             | lognormal    | 0.74<br>(0.55,0.95) | 0.64<br>(0.55,0.71) | 2.57<br>(2.06,3.16) | 0.73<br>(0.61,0.93) | 2.09<br>(1.73,2.58) | 6.03<br>(4.49,7.53)    |
| Onset to hospitalization; among symptom-based             | lognormal    | 1.23<br>(1.12,1.33) | 0.79<br>(0.74,0.83) | 4.64<br>(4.13,5.1)  | 0.93<br>(0.82,1.08) | 3.41<br>(3.06,3.78) | 12.42<br>(10.89,13.77) |
| Onset to isolation; among contact-based                   | lognormal    | 0.77<br>(0.53,0.97) | 0.67<br>(0.56,0.75) | 2.71<br>(2.08,3.31) | 0.72<br>(0.58,0.96) | 2.17<br>(1.71,2.64) | 6.52<br>(4.69,8.24)    |
| Onset to isolation; among symptom-based                   | lognormal    | 1.22<br>(1.12,1.31) | 0.78<br>(0.73,0.83) | 4.58<br>(4.13,5.02) | 0.94<br>(0.82,1.08) | 3.38<br>(3.07,3.69) | 12.19<br>(10.79,13.62) |
| Arrival to symptom onset; among onset after arrival       | lognormal    | 1.22<br>(1.1,1.34)  | 0.85<br>(0.79,0.91) | 4.87<br>(4.24,5.49) | 0.83<br>(0.71,0.97) | 3.38<br>(2.99,3.81) | 13.79<br>(11.75,15.86) |
| Arrival to confirmation; among onset on or before arrival | weibull      | 1.28<br>(1.04,1.59) | 4.8<br>(4.05,5.58)  | 4.5<br>(3.81,5.07)  | 0.47<br>(0.25,0.83) | 3.61<br>(2.92,4.35) | 11.32<br>(9.56,13.06)  |
| Arrival to isolation; among onset on or before arrival    | gamma        | 0.39<br>(0.3,0.54)  | 0.13<br>(0.1,0.18)  | 3.05<br>(2.49,3.67) | 0<br>(0,0.02)       | 1.09<br>(0.67,1.66) | 12.75<br>(10.57,14.84) |

**Table S3:** Comparison of age distribution of cases with Shenzhen 2010 census (source <http://www.stats.gov.cn/english/>)

| Age category | N          | Proportion | Contact-based | Symptom-based |
|--------------|------------|------------|---------------|---------------|
| 0-9 years    | 736,978    | 7%         | 13 (14.9%)    | 6 (2.1%)      |
| 10-19 years  | 1,058,098  | 10%        | 5 (5.7%)      | 6 (2.1%)      |
| 20-29 years  | 3,783,127  | 37%        | 11 (12.6%)    | 23 (7.9%)     |
| 30-39 years  | 2,528,979  | 24%        | 15 (17.2%)    | 71 (24.3%)    |
| 40-49 years  | 1,478,974  | 14%        | 9 (10.3%)     | 49 (16.8%)    |
| 50-59 years  | 466,403    | 5%         | 10 (11.5%)    | 63 (21.6%)    |
| 60-69 years  | 192,595    | 2%         | 20 (23.0%)    | 60 (20.5%)    |
| 70+ years    | 113,227    | 1%         | 4 (4.6%)      | 14 (4.8%)     |
| Total        | 10,358,381 | 100%       | 87 (100.0%)   | 292 (100.0%)  |

**Table S4:** Comparison of observed serial intervals by time from symptom onset to isolation.

| Time to isolation | Mean serial interval (95% CI) |
|-------------------|-------------------------------|
| 0-2 days          | 3.6 (3.0, 4.2)                |
| 3-5 days          | 8.1 (5.3, 11.0)               |
| 6 or more days    | 8.0 (6.2, 9.7)                |

**Table S5.** Time to recovery from symptom onset in days.

| Variable          | Value         | Time to recovery | 2.5% | 97.5% |
|-------------------|---------------|------------------|------|-------|
| sex               | female        | 20.3             | 19.4 | 21.3  |
|                   | male          | 21.2             | 20.2 | 22.3  |
| age               | 0-9           | 17.5             | 15.3 | 20.0  |
|                   | 10-19         | 19.1             | 15.8 | 22.9  |
|                   | 20-29         | 19.2             | 17.5 | 21.0  |
|                   | 30-39         | 19.2             | 18.0 | 20.5  |
|                   | 40-49         | 21.6             | 20.0 | 23.4  |
|                   | 50-59         | 22.4             | 20.8 | 24.1  |
|                   | 60-69         | 22.9             | 21.2 | 24.7  |
|                   | 70+           | 22.5             | 19.1 | 26.3  |
| severity          | mild          | 20.1             | 19.0 | 21.3  |
|                   | moderate      | 20.3             | 19.5 | 21.1  |
|                   | severe        | 28.3             | 25.3 | 31.6  |
| mode of detection | contact-based | 19.3             | 17.9 | 20.9  |
|                   | symptom-based | 21.2             | 20.4 | 22.0  |
| Total             | Total         | 20.8             | 20.1 | 21.5  |

**Table S6.** Sensitivity analysis of age specific attack rates and risk for SAR-CoV-2 infection among household close contacts.

| Age group of contacts | N   | Infected | Attack rate % (95% CI) | Univariate regression |      |        |
|-----------------------|-----|----------|------------------------|-----------------------|------|--------|
|                       |     |          |                        | Odds ratio            | 2.5% | 97.5%  |
| 0-9                   | 109 | 10       | 9.17 (5.06,16.07)      | 2.26                  | 0.20 | 26.13  |
| 10-19                 | 57  | 6        | 10.53 (4.91,21.12)     | 5.48                  | 0.44 | 67.79  |
| 20-29                 | 48  | 7        | 14.58 (7.25,27.17)     | 7.28                  | 0.50 | 105.61 |
| 30-39                 | 156 | 14       | 8.97 (5.42,14.50)      | 1.93                  | 0.18 | 21.12  |
| 40-49                 | 69  | 7        | 10.14 (5.00,19.49)     | 8.76                  | 0.69 | 110.63 |
| 50-59                 | 59  | 10       | 16.95 (9.48,28.46)     | Ref                   | ..   | ..     |
| 60-69                 | 86  | 18       | 20.93 (13.67,30.68)    | 2.53                  | 0.23 | 27.59  |
| 70+                   | 44  | 5        | 11.36 (4.95,23.98)     | 6.44                  | 0.45 | 92.93  |

**Table S7.** Sensitivity analyses showing demographic and clinical characteristics of cases by contact-based vs. symptom-based surveillance after truncating data after Feb 7<sup>th</sup> 2020 when the definition of a confirmed case changed to require symptom.

| <b>Variable</b> | <b>Value</b> | <b>Contact-based surveillance (N=74)</b> | <b>Symptom-based surveillance (N=270)</b> | <b>Unknown/other (N=10)</b> | <b>Total (N=354)</b> | <b>P-value</b> |
|-----------------|--------------|------------------------------------------|-------------------------------------------|-----------------------------|----------------------|----------------|
| sex             | F            | 54 (73.0%)                               | 124 (45.9%)                               | 9 (90.0%)                   | 187 (52.8%)          | 0.0001         |
|                 | M            | 20 (27.0%)                               | 146 (54.1%)                               | 1 (10.0%)                   | 167 (47.2%)          |                |
| age             | 0-9          | 13 (17.6%)                               | 6 (2.2%)                                  | 1 (10.0%)                   | 20 (5.6%)            | <0.0001        |
|                 | 10-19        | 5 (6.8%)                                 | 5 (1.9%)                                  | 0 (0.0%)                    | 10 (2.8%)            |                |
|                 | 20-29        | 7 (9.5%)                                 | 22 (8.1%)                                 | 0 (0.0%)                    | 29 (8.2%)            |                |
|                 | 30-39        | 12 (16.2%)                               | 66 (24.4%)                                | 1 (10.0%)                   | 79 (22.3%)           |                |
|                 | 40-49        | 6 (8.1%)                                 | 45 (16.7%)                                | 2 (20.0%)                   | 53 (15.0%)           |                |
|                 | 50-59        | 10 (13.5%)                               | 57 (21.1%)                                | 1 (10.0%)                   | 68 (19.2%)           |                |
|                 | 60-69        | 18 (24.3%)                               | 58 (21.5%)                                | 5 (50.0%)                   | 81 (22.9%)           |                |
|                 | 70+          | 3 (4.1%)                                 | 11 (4.1%)                                 | 0 (0.0%)                    | 14 (4.0%)            |                |
| severity        | mild         | 16 (21.6%)                               | 76 (28.1%)                                | 2 (20.0%)                   | 94 (26.6%)           | 0.083          |
|                 | moderate     | 55 (74.3%)                               | 166 (61.5%)                               | 6 (60.0%)                   | 227 (64.1%)          |                |
|                 | severe       | 3 (4.1%)                                 | 28 (10.4%)                                | 2 (20.0%)                   | 33 (9.3%)            |                |
| symptomatic     | no           | 15 (20.3%)                               | 8 (3.0%)                                  | 0 (0.0%)                    | 23 (6.5%)            | <0.0001        |
|                 | yes          | 59 (79.7%)                               | 262 (97.0%)                               | 10 (100.0%)                 | 331 (93.5%)          |                |
| fever           | no           | 21 (28.4%)                               | 31 (11.5%)                                | 2 (20.0%)                   | 54 (15.3%)           | 0.0006         |
|                 | yes          | 53 (71.6%)                               | 239 (88.5%)                               | 8 (80.0%)                   | 300 (84.7%)          |                |

**Table S8.** Sensitivity analyses showing the association of clinical and demographic factors with mode of detection and severity at initial assessment after truncating data after Feb 7<sup>th</sup> 2020 when the definition of a confirmed case changed to require symptom.

|             |          | Outcome: symptom-based surveillance |      |       |                         |      |       | Outcome: moderate/severe symptom |      |       |                         |      |       |
|-------------|----------|-------------------------------------|------|-------|-------------------------|------|-------|----------------------------------|------|-------|-------------------------|------|-------|
|             |          | Univariate regression               |      |       | Multivariate regression |      |       | Univariate regression            |      |       | Multivariate regression |      |       |
|             |          | OR                                  | 2.5% | 97.5% | OR                      | 2.5% | 97.5% | OR                               | 2.5% | 97.5% | OR                      | 2.5% | 97.5% |
| sex         | female   | ref                                 | ..   | ..    | ref                     | ..   | ..    | ref                              | ..   | ..    | ref                     | ..   | ..    |
|             | male     | 3.18                                | 1.83 | 5.71  | 3.18                    | 1.75 | 6.01  | 1.38                             | 0.85 | 2.24  | 1.37                    | 0.85 | 2.22  |
| age         | 0-9      | 0.08                                | 0.02 | 0.25  | 0.08                    | 0.02 | 0.27  | 0.86                             | 0.29 | 2.74  | 0.67                    | 0.22 | 2.23  |
|             | 10-19    | 0.18                                | 0.04 | 0.73  | 0.14                    | 0.03 | 0.63  | 0.92                             | 0.23 | 4.63  | 0.88                    | 0.22 | 4.40  |
|             | 20-29    | 0.55                                | 0.19 | 1.69  | 0.6                     | 0.2  | 1.89  | 0.49                             | 0.2  | 1.21  | 0.61                    | 0.26 | 1.49  |
|             | 30-39    | 0.96                                | 0.38 | 2.4   | 0.99                    | 0.38 | 2.52  | 1.15                             | 0.55 | 2.4   | 1.15                    | 0.57 | 2.33  |
|             | 40-49    | 1.32                                | 0.45 | 4.12  | 1.16                    | 0.39 | 3.73  | 1.16                             | 0.51 | 2.68  | 1.21                    | 0.55 | 2.72  |
|             | 50-59    | ref                                 | ..   | ..    | ref                     | ..   | ..    | ref                              | ..   | ..    | Ref                     | ..   | ..    |
|             | 60-69    | 0.57                                | 0.23 | 1.31  | 0.51                    | 0.2  | 1.23  | 1.61                             | 0.74 | 3.54  | 1.43                    | 0.68 | 3.03  |
|             | 70+      | 0.64                                | 0.16 | 3.2   | 0.52                    | 0.13 | 2.72  | 1.45                             | 0.4  | 6.93  | 1.28                    | 0.40 | 4.96  |
| severity    | mild     | ref                                 | ..   | ..    | ref                     | ..   | ..    | ..                               | ..   | ..    | ..                      | ..   | ..    |
|             | moderate | 0.64                                | 0.33 | 1.16  | 0.53                    | 0.26 | 1.03  | ..                               | ..   | ..    | ..                      | ..   | ..    |
|             | severe   | 1.96                                | 0.6  | 8.9   | 1.37                    | 0.37 | 6.74  | ..                               | ..   | ..    | ..                      | ..   | ..    |
| fever       | no       | ref                                 | ..   | ..    | ..                      | ..   | ..    | ref                              | ..   | ..    | ..                      | ..   | ..    |
|             | yes      | 3.05                                | 1.62 | 5.71  | ..                      | ..   | ..    | 0.9                              | 0.44 | 1.73  | ..                      | ..   | ..    |
| symptomatic | no       | ref                                 | ..   | ..    | ..                      | ..   | ..    | ref                              | ..   | ..    | ..                      | ..   | ..    |

|                     |               |      |      |       |    |    |    |      |      |      |      |      |      |
|---------------------|---------------|------|------|-------|----|----|----|------|------|------|------|------|------|
|                     | yes           | 8.33 | 3.45 | 21.54 | .. | .. | .. | 0.39 | 0.09 | 1.18 | ..   | ..   | ..   |
| Surveillance method | Contact-based | ..   | ..   | ..    | .. | .. | .. | ref  | ..   | ..   | ..   | ..   | ..   |
|                     | symptom-based | ..   | ..   | ..    | .. | .. | .. | 0.7  | 0.37 | 1.28 | 0.55 | 0.29 | 1.01 |



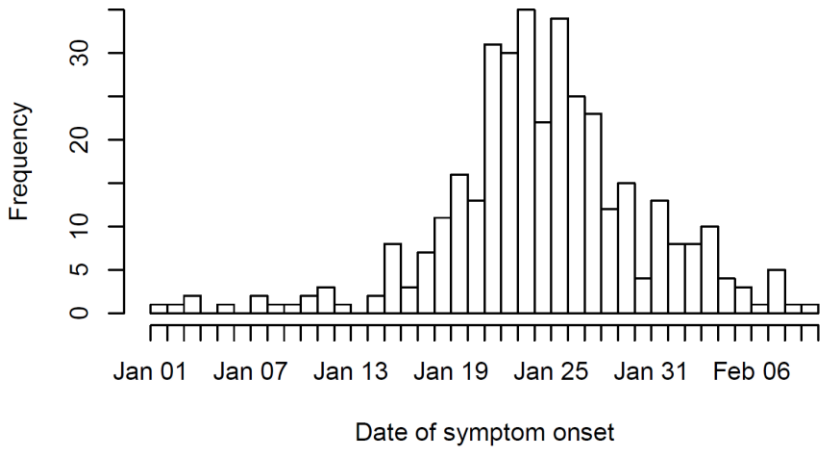

**Figure S1.** Epidemic curve of cases in Shenzhen identified before Feb 12, 2020.

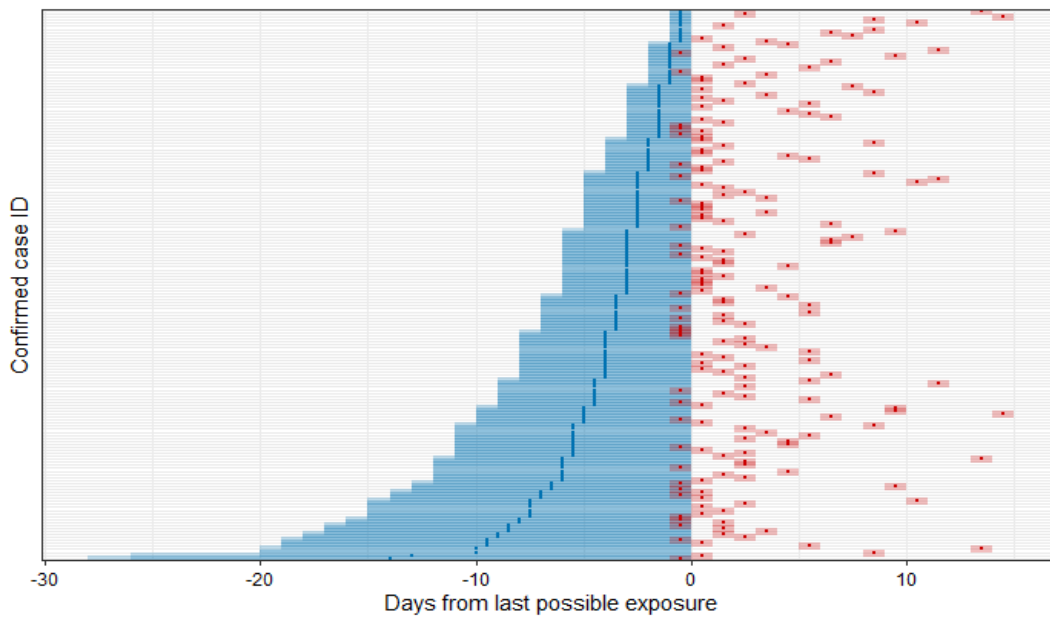

**Figure S2:** The exposure and symptom onset windows 339 confirmed cases from Shenzhen, China. Shaded regions represent the full possible interval of exposure (blue) and of symptom onset (red); points represent the midpoint of these intervals. The exposure and symptom onset windows are aligned relative to the right-bound of the exposure window.

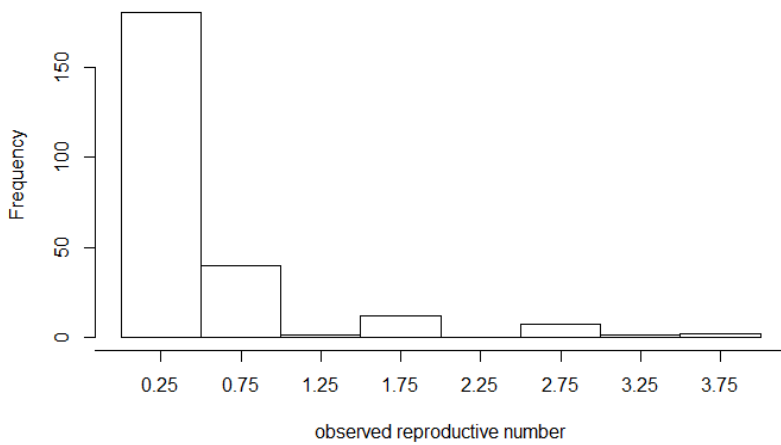

**Figure S3.** Distribution of the observed individual reproductive numbers in Shenzhen.

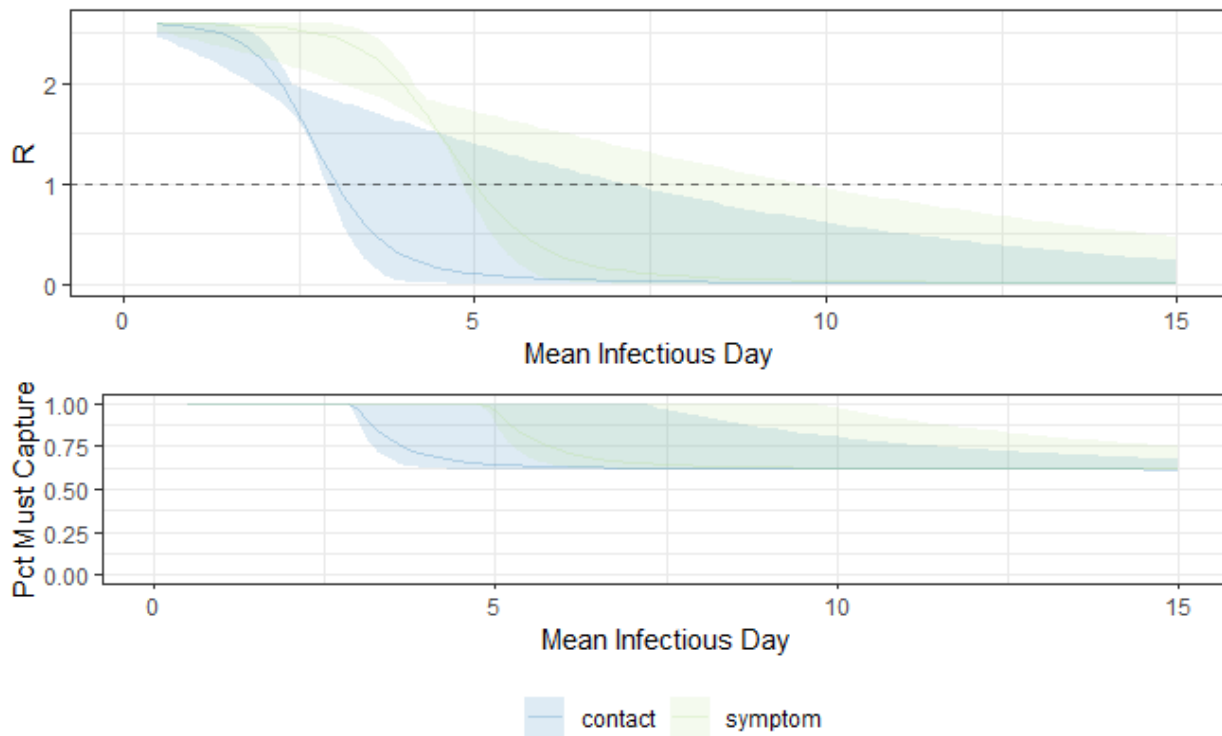

**Figure S4:** Effective  $R$  among those captured by surveillance (top) and proportion needed to be captured by surveillance to drive  $R$  less than one (bottom) by the weighted mean day of the infectious period. Weighting is by relative infectiousness, which is assumed to follow a gamma distribution. The shaded area covers all gamma distributions with a mean of that day and a rate parameter in the range of 0.1-10. See Appendix Page 10 for detailed methods.

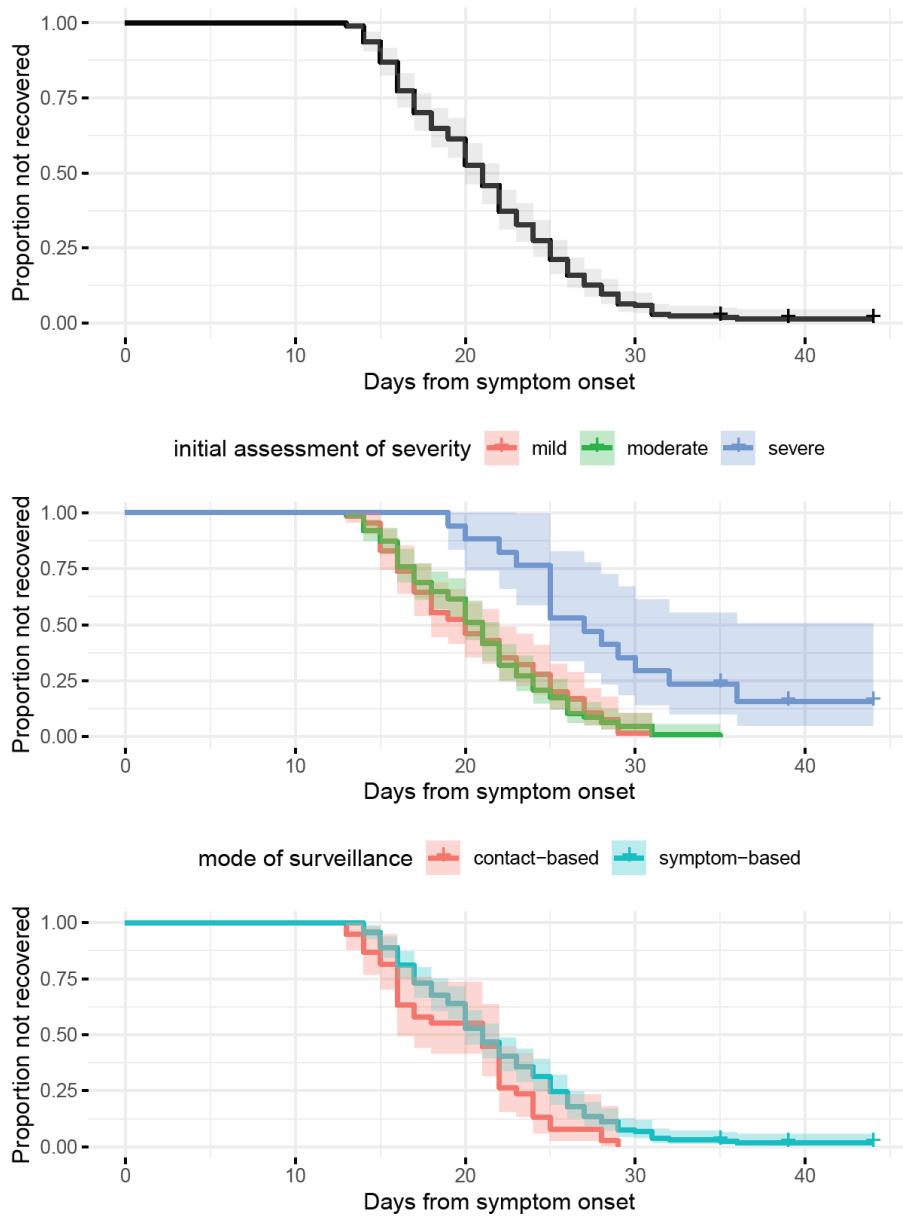

**Figure S5:** Time from symptom onset to recovery for all cases (top), by clinical severity at initial assessment (middle), and by mode of surveillance (bottom). Time from symptom onset to death was marked by “+” for the three patients who died.

### **Text S1: Data extraction and confirmation details**

By categorizing COVID-19 as a notifiable disease Class B, Chinese Law on the Prevention and Treatment of Infectious Diseases required all cases to be immediately reported to China's Infectious Disease Information System. Each case was recorded into the system by local epidemiologists and public health professionals who did the field investigation and collected possible exposure related information. All data on COVID-19 case reported in Shenzhen were extracted from the Infectious Disease Information System by the end of February 12, 2020. Then personal information including demographics, symptoms, clinical outcome and severity and so on, were stripped to construct an anonymous dataset. All cases were included without sampling and no eligibility criteria were needed. Aggregated data may be available upon request.

All laboratory confirmation of SARS-CoV-2 were done by Guangdong Center for Disease Prevention and Control (CDC) before Jan 30, 2020, and then only need to be done by Shenzhen CDC, when it obtained the qualification of laboratory-confirmation of 2019-nCoV from the authority. The RT-PCR assay was conducted in the BSL-2 laboratory of Shenzhen CDC, using the protocol established by the World Health Organization and China CDC.

### **Text S2: Observed reproductive number calculation**

We calculated the mean observed reproductive number as the ratio of the number of infectees (N) to the number of potential infectors (M) across all risk sets, so  $\bar{R}_{obs} = N/M$ . To calculate overdispersion, we took a multiple imputation approach, where in each imputation any infectee who could have been infected by multiple individuals was randomly assigned one as their actual infector. Independent imputations were conducted with each bootstrap draw.

### **Text S3: Supplemental calculation**

Let  $R_0$  be the basic reproductive number,  $\rho$  be the percent of transmission due to cases potentially reachable by the surveillance system, and  $\gamma$  be the relative effective infectious period of those captured by surveillance. Then:

$$R = \rho\gamma R_0 + (1 - \rho)R_0$$

When  $R$  is below one, sustained outbreaks are impossible. Hence, for a known  $R_0$  and  $\gamma$  such that  $\gamma R_0 < 1$ , we can calculate the proportion of transmission that must be from people who can be captured by surveillance as:

$$\rho = \frac{1 - R_0}{R_0(\gamma - 1)}$$

Assuming an  $R_0$  of 2.6 and that surveillance reduces  $R_0$  by a factor of 0.18, we find control is possible if 75% of people can be captured by surveillance.

### **Text S4: Analysis of impact of surveillance**

We calculated the potential impact of symptom and contact based surveillance by calculating the impact of a truncated infectious period on  $R_0$ . As this calculation is heavily dependent on the distribution of infectiousness over time, and that distribution is largely unknown, we explored large number of infectious period distributions, considering those where the mean day of infectiousness (i.e., the average day after an infector's symptom onset on which a secondary case they caused would be infected) and the overall distribution of infectiousness follows a gamma distribution with a rate parameter ranging between 0.1 and 10. We then calculated the expected resulting  $R$  if individuals were removed from the population based on symptom or contact based surveillance (Fig S4), thereby truncating their infectious period.
